# Supplementary material for: Alteration in circulating metabolites during and after heat stress in the conscious rat: potential biomarkers of exposure and organ-specific injury
Source: PubMed Central journal article supplement (PMC4306243; doi:10.1186/s12899-014-0014-0), 2014-12-24

A

| Biochemical Name                 | Fold change, Heat/Control |                |                      |                    |
|----------------------------------|---------------------------|----------------|----------------------|--------------------|
|                                  | T <sub>c,Max</sub>        | 24 hr Recovery | Heat 48 hr Uninjured | Heat 48 hr Injured |
| <b>Purine Metabolism</b>         |                           |                |                      |                    |
| adenosine 5'-monophosphate (AMP) | -1.33                     | -2.08          | 1.24                 | 1.34               |
| N1-methyladenosine               | <b>1.68</b>               | <b>1.37</b>    | 1.27                 | -1.10              |
| N6-carbamoylthreonyladenosine    | <b>2.92</b>               | <b>1.33</b>    | <b>1.35</b>          | <b>1.43</b>        |
| allantoin                        | <b>6.30</b>               | 1.04           | 1.21                 | -1.01              |
| urate                            | <b>5.20</b>               | 1.11           | 1.11                 | 1.02               |
| <b>Pyrimidine Metabolism</b>     |                           |                |                      |                    |
| 2'-deoxycytidine                 | <b>1.19</b>               | <b>1.22</b>    | 1.08                 | 1.05               |
| 5-methyl-2'-deoxycytidine        | <b>1.21</b>               | 1.10           | <b>1.41</b>          | <b>1.30</b>        |
| 5-methylcytidine                 | <b>1.21</b>               | <b>1.10</b>    | 1.05                 | 1.06               |
| cytidine                         | <b>-1.19</b>              | <b>1.22</b>    | -1.04                | -1.03              |
| cytosine                         | 1.14                      | 1.22           | -1.20                | -1.09              |
| N4-acetylcytidine                | <b>1.61</b>               | -1.06          | <b>1.61</b>          | <b>1.87</b>        |
| dihydroorotate                   | -1.03                     | <b>-1.43</b>   | -1.25                | -1.16              |
| orotate                          | <b>1.51</b>               | -1.03          | -1.03                | -1.06              |
| thymidine                        | <b>1.85</b>               | <b>1.81</b>    | 1.05                 | 1.07               |
| 5,6-dihydrouracil                | <b>1.32</b>               | <b>-1.37</b>   | <b>-1.34</b>         | <b>-1.87</b>       |
| pseudouridine                    | <b>1.80</b>               | <b>1.24</b>    | <b>1.35</b>          | 1.16               |
| uracil                           | <b>1.45</b>               | <b>1.28</b>    | 1.14                 | 1.21               |
| uridine                          | -1.06                     | 1.02           | <b>-1.28</b>         | -1.15              |

B

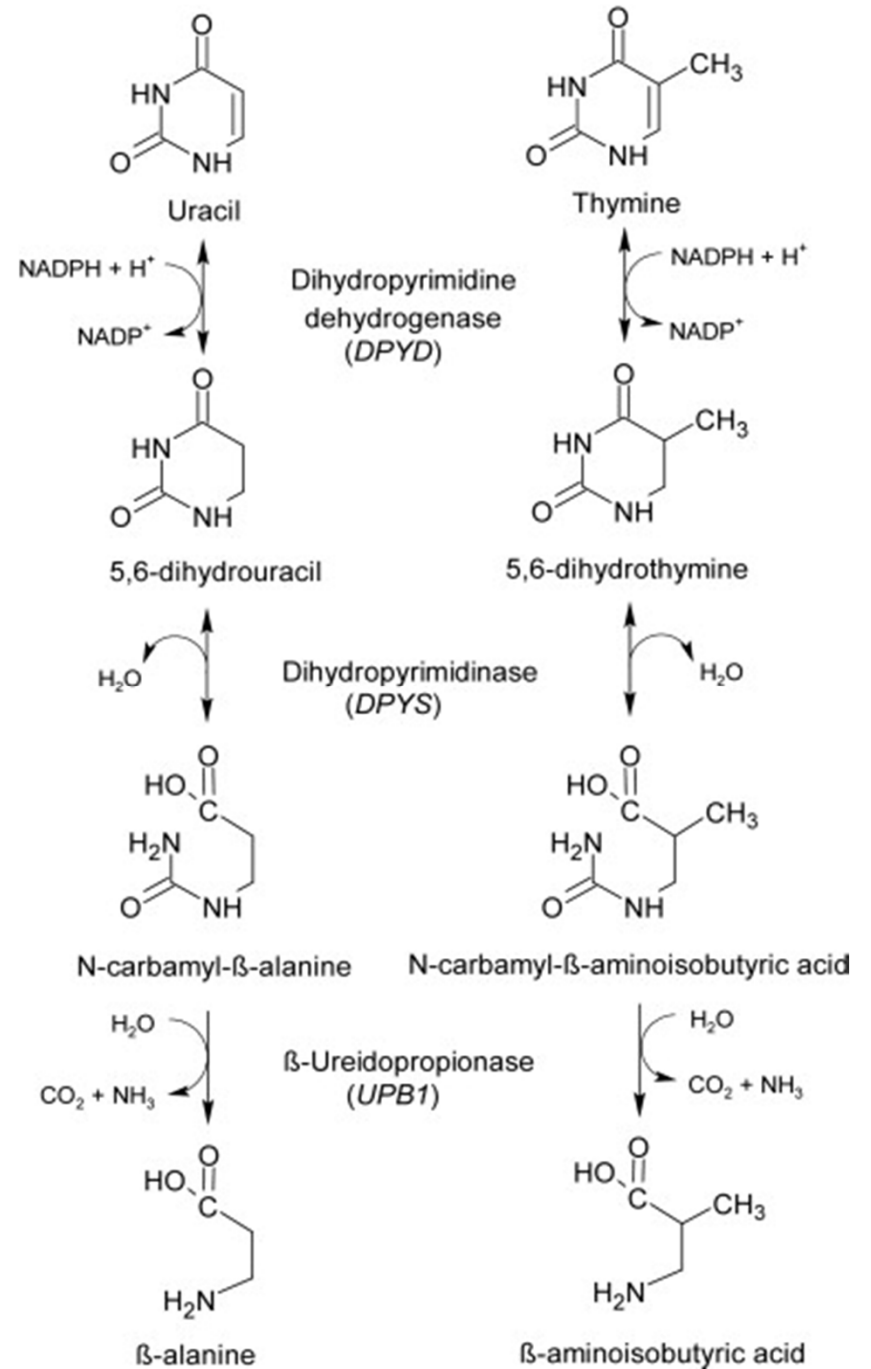

Supplement: 12899_2014_14_MOESM2_ESM.pdf [file 12899_2014_14_MOESM2_ESM.pdf]
