# Supplementary material for: Alteration in circulating metabolites during and after heat stress in the conscious rat: potential biomarkers of exposure and organ-specific injury
Source: PubMed Central journal article supplement (PMC4306243; doi:10.1186/s12899-014-0014-0), 2014-12-24

# Additional File 5

A

| Biochemical Name                                        | Fold change, Heat/Control |                |                      |                    |
|---------------------------------------------------------|---------------------------|----------------|----------------------|--------------------|
|                                                         | T <sub>c,Max</sub>        | 24 hr Recovery | Heat 48 hr Uninjured | Heat 48 hr Injured |
| <b>Amino Acids</b>                                      |                           |                |                      |                    |
| alanine                                                 | -1.69                     | -1.16          | -1.18                | -1.09              |
| proline                                                 | -1.56                     | -1.10          | -1.18                | -1.17              |
| arginine                                                | -1.41                     | -1.04          | -1.05                | 1.05               |
| asparagine                                              | -1.35                     | -1.33          | -1.22                | -1.25              |
| serine                                                  | -1.32                     | -1.11          | -1.15                | 1.11               |
| threonine                                               | -1.32                     | -1.06          | -1.14                | -1.11              |
| histidine                                               | -1.14                     | -1.03          | -1.04                | 1.02               |
| glycine                                                 | -1.12                     | 1.01           | 1.02                 | 1.09               |
| glutamine                                               | 1.06                      | 1.05           | 1.01                 | 1.15               |
| phenylalanine                                           | 1.06                      | 1.02           | -1.03                | 1.07               |
| tyrosine                                                | 1.14                      | 1.06           | 1.01                 | 1.10               |
| methionine                                              | 1.15                      | -1.03          | 1.03                 | 1.08               |
| isoleucine                                              | 1.18                      | -1.14          | -1.11                | -1.08              |
| lysine                                                  | 1.22                      | 1.62           | 1.60                 | 2.87               |
| leucine                                                 | 1.25                      | -1.08          | -1.14                | -1.10              |
| valine                                                  | 1.27                      | -1.15          | -1.14                | -1.08              |
| tryptophan                                              | 1.40                      | -1.18          | -1.04                | -1.02              |
| cysteine                                                | 1.96                      | -1.03          | 1.05                 | 1.25               |
| <b>Glycolysis, gluconeogenesis, pyruvate metabolism</b> |                           |                |                      |                    |
| glutamate                                               | 2.87                      | -1.45          | -1.34                | -1.16              |
| 1,3-dihydroxyacetone                                    | -1.47                     | 1.09           | 1.18                 | -1.04              |
| glucose                                                 | -1.11                     | -1.15          | -1.08                | -1.00              |
| pyruvate                                                | -1.09                     | -1.20          | 1.01                 | -1.25              |
| lactate                                                 | 1.03                      | -1.05          | -1.15                | -1.10              |
| 1,5-anhydroglucitol (1,5-AG)                            | 1.20                      | -1.11          | -1.01                | 1.01               |
| 3-phosphoglycerate                                      | 1.37                      | 1.05           | 1.36                 | 1.38               |
| glycerate                                               | 1.56                      | -1.25          | -1.41                | -1.99              |

B

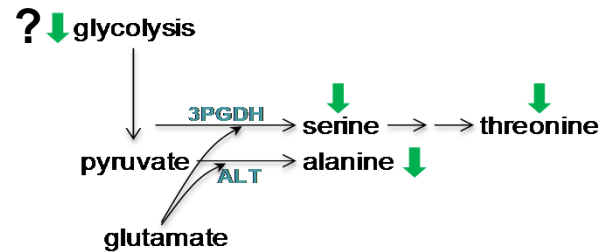

Supplement: 12899_2014_14_MOESM5_ESM.pdf [file 12899_2014_14_MOESM5_ESM.pdf]
