# Supplementary material for: Alteration in circulating metabolites during and after heat stress in the conscious rat: potential biomarkers of exposure and organ-specific injury
Source: PubMed Central journal article supplement (PMC4306243; doi:10.1186/s12899-014-0014-0), 2014-12-24
Supplement: 12899_2014_14_MOESM3_ESM.pdf [file 12899_2014_14_MOESM3_ESM.pdf]

## Additional File 3

|                       | Fold change, Heat/Control |                |                      |                    |
|-----------------------|---------------------------|----------------|----------------------|--------------------|
|                       | T <sub>c,Max</sub>        | 24 hr Recovery | Heat 48 hr Uninjured | Heat 48 hr Injured |
| N-acetylalanine       | <b>1.99</b>               | 1.32           | -1.01                | <b>-1.54</b>       |
| N-acetyl-beta-alanine | <b>2.70</b>               | <b>1.72</b>    | <b>1.29</b>          | <b>1.31</b>        |
| N-acetylglycine       | <b>1.37</b>               | 1.02           | 1.02                 | 1.23               |
| N-acetylisoleucine    | <b>5.38</b>               | <b>-1.35</b>   | 1.04                 | <b>-1.54</b>       |
| N-acetylleucine       | <b>4.81</b>               | <b>-1.39</b>   | 1.30                 | -1.20              |
| N-acetylmethionine    | <b>3.78</b>               | <b>-1.32</b>   | 1.29                 | -1.03              |
| N-acetylneuraminate   | <b>2.62</b>               | <b>1.59</b>    | <b>1.45</b>          | 1.17               |
| N-acetylmornithine    | -1.01                     | <b>-1.32</b>   | -1.18                | <b>-1.50</b>       |
| N-acetylphenylalanine | <b>1.96</b>               | -1.33          | 1.25                 | 1.02               |
| N-acetylthreonine     | <b>3.10</b>               | 1.08           | <b>1.65</b>          | <b>1.35</b>        |
| N-acetyltryptophan    | <b>4.18</b>               | <b>-1.49</b>   | 1.31                 | -1.06              |
| N-acetyltyrosine      | <b>2.76</b>               | <b>-1.96</b>   | -1.25                | <b>-1.84</b>       |
| N-acetylvaline        | <b>4.34</b>               | 1.00           | 1.00                 | 1.00               |
