# Supplementary material for: Alteration in circulating metabolites during and after heat stress in the conscious rat: potential biomarkers of exposure and organ-specific injury
Source: PubMed Central journal article supplement (PMC4306243; doi:10.1186/s12899-014-0014-0), 2014-12-24
Supplement: 12899_2014_14_MOESM6_ESM.pdf [file 12899_2014_14_MOESM6_ESM.pdf]

# Additional File 6

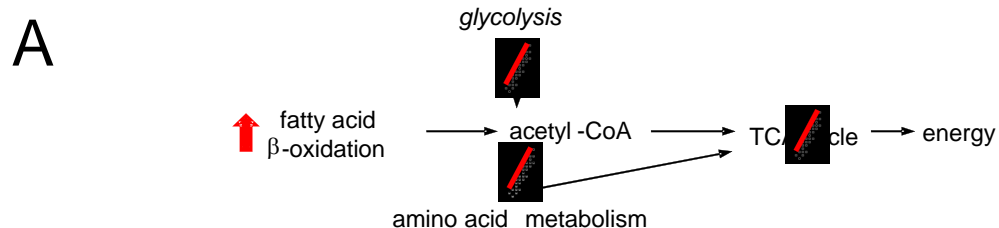

**B**

| Biochemical Name   | Fold change, Heat/Control |                |                      |                    |
|--------------------|---------------------------|----------------|----------------------|--------------------|
|                    | T <sub>c,Max</sub>        | 24 hr Recovery | Heat 48 hr Uninjured | Heat 48 hr Injured |
| pelargonate (9:0)  | -1.96                     | 1.02           | 1.08                 | -1.09              |
| heptanoate (7:0)   | -1.85                     | -1.05          | -1.01                | -1.32              |
| caprate (10:0)     | -1.43                     | 1.01           | 1.15                 | 1.08               |
| caprylate (8:0)    | -1.33                     | -1.03          | 1.06                 | -1.12              |
| undecanoate (11:0) | -1.27                     | 1.52           | -1.09                | 1.11               |
| laurate (12:0)     | -1.18                     | 1.12           | 1.08                 | 1.11               |
| caproate (6:0)     | -1.03                     | -1.05          | -1.05                | -1.02              |
| isocaproate        | 2.59                      | 2.26           | 1.21                 | 1.61               |

**C**

| Biochemical Name         | Fold change, Heat/Control |                |                      |                    |
|--------------------------|---------------------------|----------------|----------------------|--------------------|
|                          | T <sub>c,Max</sub>        | 24 hr Recovery | Heat 48 hr Uninjured | Heat 48 hr Injured |
| 3-dehydrocarnitine*      | 1.17                      | 1.16           | -1.17                | -1.27              |
| acetylcarnitine          | 1.24                      | 1.04           | -1.01                | 1.07               |
| carnitine                | 1.03                      | 1.11           | -1.06                | 1.21               |
| deoxycarnitine           | -1.12                     | 1.08           | -1.14                | -1.04              |
| hexanoylcarnitine        | 1.41                      | 1.28           | 1.35                 | 1.58               |
| oleoylcarnitine          | -1.05                     | 1.52           | 2.67                 | 3.17               |
| palmitoylcarnitine       | -1.22                     | 1.10           | 2.37                 | 2.67               |
| stearoylcarnitine        | -1.30                     | 1.07           | 1.87                 | 1.98               |
| 3-hydroxybutyrate (BHBA) | 2.58                      | -1.10          | -1.00                | -1.11              |
