# Supplementary material for: Alteration in circulating metabolites during and after heat stress in the conscious rat: potential biomarkers of exposure and organ-specific injury
Source: PubMed Central journal article supplement (PMC4306243; doi:10.1186/s12899-014-0014-0), 2014-12-24
Supplement: 12899_2014_14_MOESM7_ESM.pdf [file 12899_2014_14_MOESM7_ESM.pdf]

# Additional File 7

A

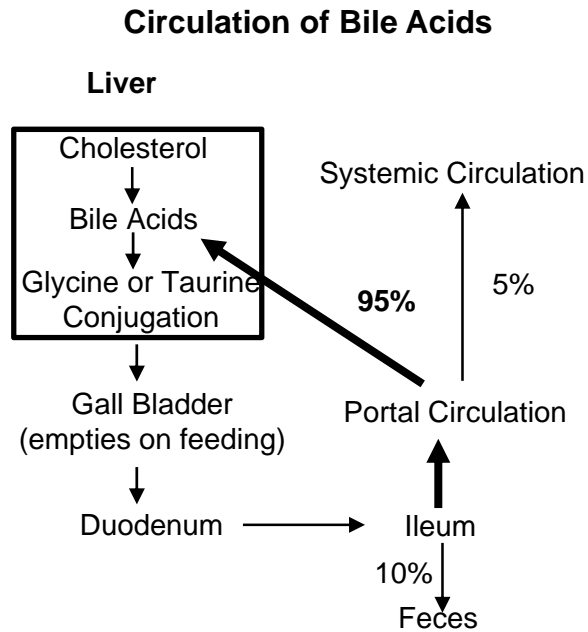

B

| Biochemical Name                               | Fold change, Heat/Control |                |                      |                    |
|------------------------------------------------|---------------------------|----------------|----------------------|--------------------|
|                                                | T <sub>c,Max</sub>        | 24 hr Recovery | Heat 48 hr Uninjured | Heat 48 hr Injured |
| <b>Sterol/Steroid</b>                          |                           |                |                      |                    |
| 7-alpha-hydroxy-3-oxo-4-cholestenoate (7-Hoca) | 1.52                      | 1.79           | 1.53                 | 1.93               |
| 7-alpha-hydroxycholesterol                     | -1.20                     | 2.93           | 3.01                 | 2.80               |
| beta-sitosterol                                | -1.04                     | -1.20          | -1.09                | -1.25              |
| campesterol                                    | -1.11                     | -1.22          | -1.14                | -1.12              |
| cholesterol                                    | -1.23                     | -1.01          | 1.06                 | 1.00               |
| corticosterone                                 | 3.07                      | 2.59           | 1.28                 | 1.92               |
| <b>Bile Acid Metabolism</b>                    |                           |                |                      |                    |
| 6-beta-hydroxylithocholate                     | -1.64                     | 1.09           | -1.45                | 1.40               |
| beta-muricholate                               | -5.56                     | 1.75           | 1.13                 | -1.09              |
| chenodeoxycholate                              | -8.33                     | -1.11          | -1.08                | -1.39              |
| cholate                                        | -9.09                     | -1.19          | -2.17                | 1.24               |
| deoxycholate                                   | -1.64                     | -1.05          | -1.32                | 1.24               |
| glycocholate                                   | -3.57                     | 1.03           | 1.52                 | 1.16               |
| taurochenodeoxycholate                         | -2.38                     | -1.79          | 1.36                 | -1.37              |
| taurocholate                                   | -9.09                     | -2.94          | 1.55                 | -1.23              |
| taurodeoxycholate                              | -4.00                     | -1.52          | -1.21                | 1.06               |
| tauroursodeoxycholate                          | -2.13                     | -2.04          | 1.30                 | -1.27              |
