# Supplementary material for: Alteration in circulating metabolites during and after heat stress in the conscious rat: potential biomarkers of exposure and organ-specific injury
Source: BMC Physiol. 2014 Dec 24;14:14. doi: 10.1186/s12899-014-0014-0 (PMC4306243; doi:10.1186/s12899-014-0014-0)
Supplement: Additional file 4: — Acute increase in sulfated biochemicals followed by a decrease at 24 hours and significant differences between uninjured animals and animals with cardiac injury at 48 hours. Of the 8 sulfated biochemicals at Tc,Max, 7 were greater in heated animals than controls; at 24 hours, 4 were significantly lower and none were significantly higher; at 48 hours in uninjured animals, 3 were significantly higher and none were significantly lower; and in heat-injured animals, 4 were higher and none were lower than controls. Red, fold change significantly higher; green, fold change significantly lower than control (p < 0.05 by ANOVA); light green, fold change slightly lower compared to controls with 0.05 < p < 0.1 by ANOVA. [file 12899_2014_14_MOESM4_ESM.pdf]

## Additional File 4

| Biochemical Name       | Fold change, Heat/Control |                |                      |                    |
|------------------------|---------------------------|----------------|----------------------|--------------------|
|                        | T <sub>c,Max</sub>        | 24 hr Recovery | Heat 48 hr Uninjured | Heat 48 hr Injured |
| cysteine               | 1.96                      | -1.03          | 1.25                 | 1.05               |
| p-cresol sulfate       | 1.66                      | -1.02          | 1.33                 | 1.37               |
| phenol sulfate         | 3.54                      | -1.61          | -1.06                | -1.28              |
| 3-indoxyl sulfate      | 2.84                      | -1.14          | -1.10                | 1.03               |
| 4-ethylphenylsulfate   | 1.16                      | -1.54          | 1.37                 | 1.05               |
| 4-vinylphenol sulfate  | 2.78                      | -2.00          | 1.79                 | 1.08               |
| catechol sulfate       | 1.40                      | -1.15          | 1.46                 | 1.20               |
| 4-acetylphenol sulfate | 5.23                      | -1.69          | 1.77                 | 1.29               |
